1  
2  
3  
4  
5  
6  
7  
8  
9  
10  
11  
12  
13  
14  
15  
16  
17  
18  
19  
20  
21  
22  
23  
24  
25  
26  
27  
28  
29

**MG53 is not a critical regulator of insulin signaling pathway in skeletal muscle**

Clothilde Philouze\*, Sophie Turban\*, Béatrice Cremers, Audrey Caliez, Gwladys Lamarche, Catherine Bernard, Nicolas Provost and Philippe Delerive

Institut de Recherches Servier, Cardiovascular and Metabolic Research, 11 rue des Moulineaux, 92150 Suresnes, France.

\*: both authors contributed equally.

Correspondence should be addressed to:

Philippe Delerive, Ph.D.  
Institut de Recherches Servier  
Cardiovascular & Metabolic Diseases  
11 rue des Moulineaux  
92150 Suresnes  
France  
E-mail: [philippe.delerive@servier.com](mailto:philippe.delerive@servier.com)  
Phone: +33 (0)155722276

**Keywords:** insulin resistance, ubiquitin E3 ligase, skeletal muscle

31 **Abstract**

32

33 In type 2 diabetes (T2D), both muscle and liver are severely resistant to insulin action. Muscle  
34 insulin resistance accounts for more than 80% of the impairment in total body glucose disposal  
35 in T2D patients and is often characterized by an impaired insulin signaling. Mitsugumin 53  
36 (MG53), a muscle-specific TRIM family protein initially identified as a key regulator of cell  
37 membrane repair machinery has been suggested to be a critical regulator of muscle insulin  
38 signaling pathway by acting as ubiquitin E3 ligase targeting both the insulin receptor and insulin  
39 receptor substrate 1 (IRS1). Here, we show using *in vitro* and *in vivo* approaches that MG53  
40 is not a critical regulator of insulin signaling and glucose homeostasis. First, MG53 expression  
41 is not consistently regulated in skeletal muscle from various preclinical models of insulin  
42 resistance. Second, MG53 gene knock-down in muscle cells does not lead to impaired insulin  
43 response as measured by Akt phosphorylation on Serine 473 and glucose uptake. Third,  
44 recombinant human MG53 does not alter insulin response in both differentiated C2C12 and  
45 human skeletal muscle cells. Fourth, ectopic expression of MG53 in HEK293 cells lacking  
46 endogenous MG53 expression fails to alter insulin response as measured by Akt  
47 phosphorylation. Finally, both male and female *mg53*<sup>-/-</sup> mice were not resistant to high fat  
48 induced obesity and glucose intolerance compared to wild-type mice. Taken together, these  
49 results strongly suggest that MG53 is not a critical regulator of insulin signaling pathway in  
50 skeletal muscle.

51

52

## 54 **Introduction**

55

56

57 Type 2 diabetes (T2D) is a global epidemic affecting more than 370 million people worldwide.  
58 It is a systemic and progressive disease characterized by hyperglycemia arising, at least in  
59 part, from beta cell dysfunction and peripheral insulin resistance [1,2]. Obesity is a major risk  
60 factor for T2D [3]. Indeed, more than 80% of patients with T2D are overweight or obese which  
61 is a major root cause for the development of insulin resistance [4]. Insulin mediates its  
62 physiological effects through the binding to its cognate receptor, namely the insulin receptor  
63 (INSR) at the plasma membrane level of target cells (See Petersen and Shulman for review  
64 [5]). There are two INSR isoforms, A and B. The B isoform is the primary isoform differentially  
65 expressed in insulin responsive tissues such as the liver, adipose tissue and skeletal muscle  
66 [6]. In skeletal muscle, insulin binding to INSR triggers the activation of the insulin receptor  
67 tyrosine kinase leading to the subsequent phosphorylation of the insulin receptor substrate 1  
68 (IRS-1). Phosphorylated IRS1 recruits and activates phosphatidylinositol-3 kinase leading  
69 ultimately via multiple signaling molecules including AKT and RAC1 to the translocation of the  
70 glucose transporter type 4 (GLUT-4) to the plasma membrane and the subsequent glucose  
71 uptake (See Petersen & Shulman for review [5]). The reduction in membrane INSR levels as  
72 well as the impaired downstream signaling contribute to explain the insulin resistance triggered  
73 by obesity. Therefore, a better understanding of these complex regulations under  
74 pathophysiological conditions may lead to the discovery of novel therapies for the treatment of  
75 insulin resistance in T2D.

76

77 Two groups reported the identification of Mitsugumin 53 (MG53) as a novel regulator of insulin  
78 signaling in skeletal muscle [7,8]. MG53 has been originally identified as a muscle-specific  
79 TRIM family protein regulating cell membrane repair machinery [9]. MG53 expression  
80 increases during myogenesis and promotes membrane repair by interacting with dysferlin-1  
81 and caveolin-3 [9]. MG53 has emerged as an exciting target for membrane repair. MG53-

82 deficient mice have clear defect in membrane repair in striated muscle resulting in progressive  
83 myopathy [9]. Conversely, intravenous injection of recombinant MG53 improves skeletal  
84 muscle damage in both mdx [10] and cardiotoxin-injected mice [11]. This therapeutic potential  
85 has been later extended to other diseases such as acute kidney injury [12] and acute lung  
86 injury [13]. Interestingly, two groups reported that MG53 regulates insulin signaling pathway *in*  
87 *vitro* and more importantly *in vivo* [7,8]. Song and coworkers showed that MG53-deficient mice  
88 are resistant to diet-induced obesity and glucose intolerance. Moreover, they showed that mild  
89 MG53 over-expression (2 to 3-fold) leads to glucose intolerance and insulin resistance. This  
90 was associated to obesity, hypertension and dyslipidemia [8]. Mechanistically, MG53  
91 negatively impacts insulin signaling pathway by targeting both INSR  $\beta$  subunit and IRS-1  
92 protein degradation via its ubiquitin E3 ligase activity [8]. These results were partially confirmed  
93 by Yi and colleagues who reported that MG53 induces IRS1 but not INSR  $\beta$  ubiquitination  
94 leading to a negative regulation of insulin signaling pathway *in vitro* and *in vivo* [7]. However,  
95 MG53 expression was not found altered in preclinical models of insulin resistance and diabetes  
96 as well as in patients [7] in contrast to what was reported by Song and colleagues [8].  
97 Nevertheless, results derived from both studies strongly suggested that MG53 might be an  
98 interesting target for the treatment of insulin resistance and its associated complications. More  
99 recently, Wu and colleagues reported that MG53 is a glucose-sensitive myokine that controls  
100 whole body insulin sensitivity by targeting allosterically the insulin receptor [14]. Furthermore,  
101 they showed that monoclonal antibody neutralizing circulating MG53 improves hyperglycemia  
102 and enhances insulin sensitivity in *db/db* mice [14]. Taken together, these results indicate that  
103 MG53 may control insulin sensitivity via multiple mechanisms.

104

105 In order to determine the therapeutic potential of targeting MG53 for the treatment of metabolic  
106 diseases, we analyzed its regulation across preclinical models of insulin resistance. We next  
107 performed both loss and gain of functions in skeletal muscle cells. Since we were not able to  
108 confirm the role of MG53 in the regulation of insulin signaling *in vitro*, we engineered *mg53* *-/-*  
109 to probe the hypothesis *in vivo*. However, in our hands, *mg53* gene deficiency did not protect

110 from diet-induced obesity nor from glucose intolerance. Taken together, our data raise  
111 significant doubts about a major role of MG53 in the regulation of insulin signaling pathway  
112 and more broadly in glucose homeostasis.

113

## 115 **Materials and Methods**

116

117

### 118 **Reagents**

119 Recombinant human MG53 (GST-tagged) was purchased from Cyclex (Japan, # CY-R2073).

120 The plasmid encoding GFP-tagged TRIM72 (GFP-MG53) and the corresponding empty vector

121 (GFP-Turbo) were purchased from OriGene Technologies, Inc. (Rockville, USA). Insulin was

122 provided by Sigma Aldrich (St Quentin Fallavier, France).

123

### 124 **Cell culture**

125 Cell lines were maintained at 37°C and 5% CO<sub>2</sub>. C2C12 cells (ATCC® CRL-1772™), a

126 mouse myoblast cell line was cultured in Dulbecco's Modified Eagle's Medium supplemented

127 with 10% fetal bovine serum. For differentiation, C2C12 were cultured in the same medium

128 with 2% horse serum for 8 days. Human Skeletal Muscle Myoblasts (HSMM) (CC-2580, Lonza)

129 were cultured following provider's instructions (Lonza). Finally, HEK293 (ATCC CRL-1573)

130 cells were cultured in Modified Eagle's Medium (glucose 1G/L) supplemented with 10% fetal

131 bovine serum, sodium pyruvate and non-essential amino acids.

132

### 133 **MG53 gene silencing using RNAi**

134 Twenty-one-nucleotide RNA oligonucleotides directed against mouse MG53 and the non-

135 silencing control siRNA ON-Target plus mouse TRIM72 siRNA-Smart pool L-065686-01 and

136 ON-Target plus Human TRIM72 siRNA-Smart pool L-032293-02 were obtained from

137 Dharmacon™ (Horizon Discovery LTD, Cambridge, UK). C2C12 cells (40% confluence) were

138 transfected with siRNAs (100nM) using Invitrogen™ Lipofectamine™ RNAiMAX transfection

139 reagent (ThermoFisher Scientific, Waltham, MA, USA) following manufacturer's instructions. 24

140 hours post-transfection, cells were refed with fresh medium for additional 24 hours.

141

### 142 **MG53 over-expression studies**

143 HEK293 cells, plated in 12-well plates at 50-60% confluence, were transiently transfected with  
144 GFP-MG53 or empty vector (GFP-Turbo) (1µg/well). 24h or 48h later, cells were refed with  
145 fresh medium containing insulin (100nM) or vehicle (BSA) for 15 minutes. At the end of the  
146 treatment period, total cell extracts were prepared for western blot analysis.

147

#### 148 **Glucose uptake assay**

149 Differentiated C2C12 cells cultured in 24-well plates were incubated in low glucose medium  
150 for 3 hours followed by glucose-free media with or without insulin (100nM) for 30 min. 1 µCi of  
151 2-Deoxy-D-[1-2-<sup>3</sup>H] glucose (PerkinElmer, Boston, MA, USA # NET328A001MC) and 10µM non-  
152 radioactive 2-DG (Sigma Aldrich) were added to each well and incubated for 10 min at room  
153 temperature. Plates were washed three times in ice-cold PBS and cells were lysed in 500µL  
154 of NAOH (1N). <sup>3</sup>H radioactivity was assessed by scintillation counting on liquid scintillation  
155 analyzer Perkin Elmer TriCarb 2910 TR. Total protein levels were quantified to normalize  
156 between each well using Bradford reagent (Bio-Rad, Marnes-la-Coquette, France).

157

#### 158 **Generation of mg53 <sup>-/-</sup> mice**

159 The model design and generation have been performed by genOway (Lyon, France). Genomic  
160 region of interest containing the murine Trim72 locus was isolated by PCR from C57BL/6 ES  
161 cell genomic DNA. PCR fragments were sub-cloned into the pCR4-TOPO vector (Invitrogen,  
162 Carlsbad, California). A 4.0-kb region comprising exons 1 and exon 2 (according to ENSEMBL  
163 gene structure ENSMUSG00000042828) as well as Trim72 proximal promoter was flanked by  
164 a distal loxP site and a Neo cassette (FRT site-PGK promoter-Neo cDNA-FRT site-LoxP site).  
165 Transcription and translation start sites as well as the Ring and B-Box Zn finger domains are  
166 deleted leading to absence of Trim72 transcription. Linearized targeting vector was transfected  
167 into C57BL/6 ES cells (genOway, Lyon, France) according to genOway's electroporation  
168 procedures (ie 108 ES cells in presence of 100µg of linearized plasmid, 260Volt, 500µF).  
169 Positive selection was started 48 hours after electroporation, by addition of 200µg/ml of G418

170 (150µg/ml of active component, Life Technologies, Inc.). G418-Resistant clones were isolated  
171 and amplified in 96-well plates. Duplicates of 96-well plates were made. The set of plates  
172 containing ES cell clones amplified on gelatin were genotyped by PCR analysis. To fully verify  
173 the integrity of the targeted region, the locus, as well as a minimum of 1kb downstream and  
174 upstream of both homology arms, was sequenced, confirming the correct targeting event.  
175 Clones were microinjected into albino C57BL/6J-Tyrc-2J/J blastocysts, and gave rise to male  
176 chimeras with a significant ES cell contribution (as determined by black coat color). Mice were  
177 bred to C57BL/6 mice expressing Flpe recombinase to remove the Neo cassette (Trim72lox  
178 mice) and to C57BL/6 mice expressing Cre recombinase to generate a constitutive deletion of  
179 Trim72 (Trim72del mice). Trim72 gene deletion was verified by PCR and ultimately by western  
180 blot analysis. For the sake of clarity, Trim72del mice are referred to mg53 <sup>-/-</sup> mice throughout  
181 the manuscript.

182

### 183 **Animal Studies**

184 Experimental protocols were approved by the Servier Institutional Animal Care and Use  
185 Committee. Mice were housed in a specific-pathogen free animal facility with standard 12:12  
186 dark-light cycle with access to standard chow and water ad libitum. Both male and female  
187 mg53 <sup>-/-</sup> (n=6 and 9 per group, respectively) or wild-type mice (n=6 and 9 per group,  
188 respectively) were placed under a 60% fat diet (Research Diet # D12492) for 16 weeks. Body  
189 weight was recorded on a weekly basis. At the end of the protocol following 4h of fasting, mice  
190 were subjected to oral glucose tolerance test (GTT). Briefly, baseline glucose was measured  
191 in all animals using a drop of blood from a tail snip wound and Accu-check active glucometers  
192 and test strips (Roche Diagnostics). Then, mice received a dose of 2g/kg of D-glucose (Merck)  
193 by oral route and blood glucose was monitored at the indicated time points.

194 Animals were sacrificed the following day and blood was recovered for serum preparation and  
195 tissue samples were quickly collected, frozen in liquid nitrogen and used for RNA or total  
196 protein extraction.

197



198 **RNA analysis**

199 Total RNA was extracted using Qiagen RNA extraction kits following manufacturer's  
200 instructions. Total RNA was treated with DNase I (Ambion Inc., Austin, Texas, USA) at 37°C  
201 for 30 minutes, followed by inactivation at 75°C for 5 minutes. Real time quantitative PCR (RT-  
202 QPCR) assays were performed using an Applied Biosystems 7500 sequence detector. Total  
203 RNA (1 µg) was reverse transcribed with random hexamers using Hight-Capacity cDNA  
204 Reverse Transcription Kit with Rnase Inhibitor (Applied Biosystems, ThermoFisher Scientific)  
205 following the manufacturer's protocol. Gene expression levels were determined by Sybr green  
206 assays (Mm\_Trim72\_1\_SG QT00315959) using QuantiFast SYBR Green PCR Kit (Qiagen).  
207 18S transcript was used as an internal control to normalize the variations for RNA amounts  
208 (Mm\_Rn18S\_3\_SG QT02448075). Gene expression levels are expressed relative to 18S  
209 mRNA levels. All the results presented are expressed as mean ± S.E.M. All the primers used  
210 in this study and Ct are available upon request.

211

212 **Western blot analysis**

213 Protein extracts (30µg) were fractionated on 10% polyacrylamide gel under reducing  
214 conditions (sample buffer containing 10 mM dithiothreitol (DTT)) and transferred onto  
215 nitrocellulose membranes. Membranes were blocked with 5% milk or BSA 5% in TBS-T 0.1%  
216 for 1h. Membranes were then washed three times with TBS-T 0.1% for 10 minutes and  
217 incubated overnight at 4°C in blocking buffer containing primary antibodies. Primary antibodies  
218 used: phospho-Akt Ser473 (#4060), total Akt (#4691), Hsp90 (# 4877) (Cell Signaling  
219 Technology, Danvers, MA), MG53 (Sigma Aldrich, # SAB2108735), Vinculin (Abcam,  
220 #ab73412) and Turbo-GFP (OriGene, # TA150041). After incubation with a secondary  
221 peroxidase-conjugated antibody, signals were detected by chemiluminescence (GE  
222 Healthcare).

223

224 **Statistical analysis**

225 Results are shown as means  $\pm$  S.E.M. Statistical significance was determined using the  
226 Student's *t* test. Differences with  $p < 0.05$  were considered to be statistically significant.  
227

## 229 **Results & Discussion**

230

231 Since MG53 has been shown to be a novel regulator of insulin signaling pathway in skeletal  
232 muscle, we first determined its expression by qPCR across various mice models of insulin  
233 resistance (Fig 1). Interestingly, MG53 was not regulated in a consistent manner across  
234 models and muscle types (gastrocnemius versus soleus) (Fig 1 A&B). Its expression is  
235 significantly lower in gastrocnemius from both HFD and *ob/ob* mice while there is no change  
236 in soleus. By contrast, MG53 was found significantly up-regulated in both muscle types in *db/db*  
237 mice. These inconsistent results are in line with previous findings reported by [7,15]. We tried  
238 to measure MG53 levels in plasma samples from these animals. However, western blot  
239 analyses led to the detection of MG53 at a lower size (data not shown) with doubts about the  
240 accuracy of the band for the MG53 signal in line with observations made by other groups [16–  
241 18].

242

243 In order to test directly the role of MG53 in insulin signaling *in vitro*, we performed loss of  
244 function experiments using small interfering RNA in differentiated C2C12 cells (Fig 2).  
245 Transfection of RNAi targeting MG53 led to a robust and reproducible gene knock-down (~80%  
246  $p < 0.05$ ) compared to siCTL or Mock transfected cells (Fig 2A) which resulted in a complete  
247 reduction in MG53 protein levels in C2C12 cells (Fig 2B). In order to evaluate the impact of  
248 MG53 gene silencing on insulin signaling pathway, we measured AKT phosphorylation as  
249 proxy in response to insulin. As expected, insulin triggered a rapid phosphorylation of AKT on  
250 Serine 473 without affecting total AKT levels in siCTL-transfected C2C12 cells (Fig 2C).  
251 Interestingly, a similar response to insulin was obtained in siMG53-transfected cells. To assess  
252 the functional consequences of insulin signaling activation, we next measured glucose uptake  
253 in differentiated cells. Again, insulin triggered as expected a modest but reproducible increase  
254 in glucose uptake in mock-transfected (+64%) or siCTL-transfected (+40%) C2C12 cells (Fig  
255 2D). Transfection of siRNA-targeting MG53 did not result in a significant potentiation of insulin  
256 response on glucose uptake in differentiated C2C12 cells (+52%) compared to control cells

257 (mock or siCTL-transfected) (Fig 2D). These data are in stark contrast with results reported  
258 previously [7,8]. Similar data were obtained in HSMMs using a similar approach. Validated  
259 siRNA-targeting MG53 did not alter insulin-response as measured by increased AKT  
260 phosphorylation levels (data not shown).

261  
262 Since we failed to confirm the role of MG53 as a negative regulator of insulin signaling pathway  
263 using loss-function studies *in vitro*, we carried out gain of function studies *in vitro*. HEK293  
264 cells were selected as a simple cellular system with good response to insulin and devoid of  
265 endogenous MG53 expression. MG53 was successfully over-expressed in HEK293 cells by  
266 transient transfection using a plasmid encoding a GFP-tagged human MG53 as demonstrated  
267 by significant protein levels measured by western blot analysis. This led to a robust MG53  
268 expression 24 and 48h post transfection. As expected, insulin treatment irrespectively of the  
269 tested concentrations (10 or 100nM) led to AKT phosphorylation without affecting total AKT  
270 levels on both mock and GFP-transfected cells (Fig 3). MG53 over-expression failed to alter  
271 this response at both 24h and 48h time points irrespectively of the tested insulin  
272 concentrations. Similar results were obtained in HepG2 cells, a human hepatoma cell line  
273 lacking also MG53 endogenous expression (data not shown).

274  
275 Since MG53 has recently been shown to behave as a glucose-responsive myokine able to  
276 control peripheral insulin sensitivity by allosterically regulating the insulin receptor [14], we  
277 tested human recombinant MG53 protein on insulin-mediated AKT phosphorylation in both  
278 mouse (C2C12) and human (HSMMs) skeletal muscle cells (Fig 4). Treatment with  
279 recombinant human MG53 (30µg/mL) did not result in a significant inhibition of insulin-  
280 mediated AKT phosphorylation in both C2C12 cells and HSMMs (Fig 4 A&B). Concentration-  
281 response studies (from 0.1 up to 30µg/mL) and extensive kinetic studies were performed (data  
282 not shown). Despite all the conditions tested, these experiments failed to reveal a negative role  
283 of MG53 on insulin signaling.

284

285 Since all *in vitro* approaches failed to confirm the role of MG53 as a modulator of insulin  
286 signaling pathway, we engineered *mg53* *-/-* mice by targeting both exon 1 and 2 (Fig 5A). Both  
287 transcription and translation start sites as well as the Ring and B-Box Zn finger domains were  
288 deleted leading to absence of *mg53* transcription. This approach led to the generation of *mg53*  
289 *-/-* mice in C5BL/6J genetic background. These mice did not display any gross abnormalities  
290 compared to wild type mice even though *mg53* *-/-* mice were born at a less than expected ratio.  
291 In order to directly test the impact of MG53 gene deficiency on glucose homeostasis, both male  
292 and female mice (*mg53* *-/-* and wild type) were placed on high fat diet for 16 weeks. Western  
293 blot analyses confirmed at the protein level the efficient deletion of MG53 gene in all animals  
294 included in the study (Fig 5B). MG53 gene deficiency did not affect weight gain nor total body  
295 weight in both males and females compared to wild type mice (Fig 5C). The high fat diet  
296 triggered a significant glucose intolerance as revealed by the oral GTT and an elevated fasting  
297 glycemia in both male and female wild type mice (Fig 5D) with males being more glucose  
298 intolerant as expected. Fasting glycemia and response to oral GTT were similar in both KO  
299 and control mice irrespectively of the gender (Fig 5D). These results suggest that MG53 is a  
300 not a critical regulator of glucose homeostasis in mice.

301  
302 Our results failed to confirm the role of MG53 as a critical regulator of insulin signaling pathway  
303 *in vitro* and of glucose homeostasis *in vivo* in contrast to earlier reports [7,8]. While we cannot  
304 exclude the possibility that different reagents may lead to different results, our data raise  
305 significant doubts about the involvement of MG53 in the regulation of insulin signaling. In  
306 addition, our data are consistent with recent reports from the Ma's lab who used alternative  
307 strategies to come to the same conclusions [16,19]. First, they showed using transgenic mice  
308 that sustained elevation of plasma MG53 levels does not compromise insulin signaling in  
309 skeletal muscle as well as glucose handling when mice were placed under high fat diet.  
310 Furthermore, they reported no impact of sustained elevation of plasma MG53 on the diabetic  
311 phenotype in *db/db* mice [19]. They further extended their findings more recently by crossing  
312 *mg53* *-/-* with *db/db* mice. MG53 gene deficiency has no impact on total body weight nor on

313 glucose homeostasis in this genetic background [16]. Our *in vitro* and *in vivo* results are highly  
314 consistent with their conclusions. In conclusion, these results do not support to further  
315 investigate MG53 as a target for insulin resistance and T2D.

316

317 The identification of novel regulators of insulin signaling pathway remains of utmost importance  
318 for the treatment of T2D and its associated complications. Several E3 ubiquitin ligases have  
319 been identified as regulators of insulin signaling pathway [20,21]. More recently, Nagarajan  
320 and coworkers identified using a large-scale RNAi screen performed in HeLa cells MARCH1  
321 as a novel negative regulator of insulin signaling [22]. Interestingly, MARCH1 controls this  
322 pathway by regulating basal insulin receptor levels via direct ubiquitination. Furthermore, its  
323 expression is altered in white adipose tissue from obese humans suggesting its potential  
324 involvement in the development of insulin resistance [22]. Whether MARCH1 could be an  
325 interesting drug target for metabolic diseases remains to be addressed since MARCH1 is  
326 known to play a role in airway allergic immunity by, at least in part, mediating ubiquitination of  
327 MHCII and CD86 in dendritic cells [23]. Furthermore, its role in CD8 T cell in adipose tissue  
328 inflammation and the link to obesity-induced insulin resistance in mice requires further studies  
329 to better understand the overall impact of MARCH1 on glucose and energy homeostasis [24].

330

### 331 **Conclusions**

332

333 Our results derived from *in vitro* and *in vivo* studies raise significant doubts about the role of  
334 MG53 in the regulation of insulin signaling pathway and more broadly in glucose homeostasis.

335

336

337 **Acknowledgments**

338

339 The authors would like to thank Kader Thiam and Marie Norbert from Genoway (Lyon, France)

340 for mg53  $-/-$  mice engineering and Emmanuelle Douillet, Mathilde Lecomte, Christophe

341 Ragonnet and Kevin Romariz for excellent technical assistance.

342

343

344 **Figure legends**

345

346

347 **Fig 1. MG53 mRNA levels in skeletal muscles from various preclinical models of insulin**  
348 **resistance.**

349 MG53 relative mRNA levels in gastrocnemius (Panel A) or soleus (Panel B) from various  
350 preclinical models of insulin resistance: High fat diet (60% fat for 12 weeks), *ob/ob* (10-week  
351 old) and *db/db* (10-week old). Data are expressed as means  $\pm$  SEM (n=10 per group; \*: p<0.05,  
352 \*\*: p<0.01, \*\*\*: p<0.001 diseased vs. control).

353

354 **Fig 2. MG53 gene knock-down does not affect insulin signaling in differentiated C2C12**  
355 **cells.**

356 C2C12 cells were transfected with small interfering RNA targeting MG53 or a non-silencing  
357 control siRNA (100nM) using Lipofectamine RNAi max. 48h post-transfection, MG53 mRNA  
358 (Panel A) and protein levels (Panel B) were assessed by qPCR and western blot analysis,  
359 respectively. Vinculin was used as a loading control (Panel B). Insulin response (20nM for 10  
360 minutes) was assessed by monitoring Akt phosphorylation on Serine 473 (Panel C). Finally,  
361 glucose uptake was measured using 2DG-glucose in response to insulin treatment (100nM)  
362 (Panel C). Data are expressed as percentage of control (Mock-transfected cells).

363

364 **Fig 3. MG53 over-expression does not affect insulin response in HEK293 cells.**

365 HEK293 cells were transfected with a MG53 expression plasmid or GFP as control. 24h (left  
366 panel) or 48h later (right panel), cells are exposed to increasing concentrations of insulin (10  
367 and 100nM) for 15 minutes. Insulin response was then evaluated using phosphor Akt levels.

368

369 **Fig 4. Recombinant human MG53 does not affect insulin response in both C2C12 cells**  
370 **and primary human skeletal muscle myoblasts.**



371 Differentiated C2C12 cells (Panel A) or HSMMs (Panel B) were preincubated with rhMG53  
372 (30µg/mL) for 1h before being treated with insulin (20nM for 10 minutes and 100nM for 30  
373 minutes, respectively) or vehicle (BSA). Akt phosphorylation was then evaluated by western  
374 blot analysis.

375

376 **Fig 5. mg53 gene deficiency does not affect high fat diet-induced obesity and glucose**  
377 **intolerance.**

378 Panel A: targeting strategy to engineer mg53 <sup>-/-</sup> mice. Panel B: western blot analysis of MG53  
379 expression in both wild type and KO mice. MW: molecular weight marker. 10µg of total protein  
380 lysate from human skeletal muscle was used as positive control. Panel C: Total body weight  
381 in both males and females wild-type and mg53 KO mice after 16 weeks of high fat diet. Panel  
382 D: An oral GTT was performed in both male and female mice (wild-type vs. KO mice) after 16  
383 weeks of high fat diet.

385 **References**  
386

387

- 388 1. DeFronzo RA, Tripathy D. Skeletal muscle insulin resistance is the primary defect in  
389 type 2 diabetes. *Diabetes care*. Diabetes Care; 2009. doi:10.2337/dc09-s302
- 390 2. Defronzo RA. From the triumvirate to the ominous octet: A new paradigm for the  
391 treatment of type 2 diabetes mellitus. *Diabetes*. Diabetes; 2009. pp. 773–795.  
392 doi:10.2337/db09-9028
- 393 3. Seshasai SRK, Kaptoge S, Thompson A, Di Angelantonio E, Gao P, Sarwar N, et al.  
394 Diabetes mellitus, fasting glucose, and risk of cause-specific death. *N Engl J Med*.  
395 2011;364: 829–841. doi:10.1056/NEJMoa1008862
- 396 4. Shulman GI. Ectopic fat in insulin resistance, dyslipidemia, and cardiometabolic  
397 disease. *New England Journal of Medicine*. Massachusetts Medical Society; 2014.  
398 pp. 1131–1141. doi:10.1056/NEJMra1011035
- 399 5. Petersen MC, Shulman GI. Mechanisms of insulin action and insulin resistance.  
400 *Physiological Reviews*. American Physiological Society; 2018. pp. 2133–2223.  
401 doi:10.1152/physrev.00063.2017
- 402 6. Belfiore A, Frasca F, Pandini G, Sciacca L, Vigneri R. Insulin receptor isoforms and  
403 insulin receptor/insulin-like growth factor receptor hybrids in physiology and disease.  
404 *Endocrine Reviews*. *Endocr Rev*; 2009. pp. 586–623. doi:10.1210/er.2008-0047
- 405 7. Yi JS, Park JS, Ham YM, Nguyen N, Lee NR, Hong J, et al. MG53-induced IRS-1  
406 ubiquitination negatively regulates skeletal myogenesis and insulin signalling. *Nat*  
407 *Commun*. 2013;4: 1–12. doi:10.1038/ncomms3354
- 408 8. Song R, Peng W, Zhang Y, Lv F, Wu HK, Guo J, et al. Central role of E3 ubiquitin  
409 ligase MG53 in insulin resistance and metabolic disorders. *Nature*. 2013;494: 375–  
410 379. doi:10.1038/nature11834
- 411 9. Cai C, Masumiya H, Weisleder N, Matsuda N, Nishi M, Hwang M, et al. MG53  
412 nucleates assembly of cell membrane repair machinery. *Nat Cell Biol*. 2009;11: 56–64.

- 413           doi:10.1038/ncb1812
- 414   10.   Weisleder N, Takizawa N, Lin P, Wang X, Cao C, Zhang Y, et al. Recombinant MG53  
415           protein modulates therapeutic cell membrane repair in treatment of muscular  
416           dystrophy. *Sci Transl Med.* 2012;4: 139ra85-139ra85.  
417           doi:10.1126/scitranslmed.3003921
- 418   11.   Zhang Y, Wu HK, Lv F, Xiao RP. MG53: Biological function and potential as a  
419           therapeutic target. *Molecular Pharmacology.* American Society for Pharmacology and  
420           Experimental Therapy; 2017. pp. 211–218. doi:10.1124/mol.117.108241
- 421   12.   Duann P, Li H, Lin P, Tan T, Wang Z, Chen K, et al. MG53-mediated cell membrane  
422           repair protects against acute kidney injury. *Sci Transl Med.* 2015;7: 279ra36-279ra36.  
423           doi:10.1126/scitranslmed.3010755
- 424   13.   Jia Y, Chen K, Lin P, Lieber G, Nishi M, Yan R, et al. Treatment of acute lung injury by  
425           targeting MG53-mediated cell membrane repair. *Nat Commun.* 2014;5: 1–12.  
426           doi:10.1038/ncomms5387
- 427   14.   Wu H-K, Zhang Y, Cao C-M, Hu X, Fang M, Yao Y, et al. Glucose-Sensitive  
428           Myokine/Cardiokine MG53 Regulates Systemic Insulin Response and Metabolic  
429           Homeostasis. *Circulation.* 2019;139: 901–914.  
430           doi:10.1161/CIRCULATIONAHA.118.037216
- 431   15.   Ma H, Liu J, Bian Z, Cui Y, Zhou X, Zhou X, et al. Effect of Metabolic Syndrome on  
432           Mitsugumin 53 Expression and Function. Peterson J, editor. *PLoS One.* 2015;10:  
433           e0124128. doi:10.1371/journal.pone.0124128
- 434   16.   Wang Q, Bian Z, Jiang Q, Wang X, Zhou X, Park KH, et al. Mg53 does not manifest  
435           the development of diabetes in db/db mice. *Diabetes.* 2020;69: 1052–1064.  
436           doi:10.2337/db19-0807
- 437   17.   Zhu H, Hsueh W, Whitson BA. Letter by Zhu et al Regarding Article, “glucose-  
438           Sensitive Myokine/Cardiokine MG53 Regulates Systemic Insulin Response and  
439           Metabolic Homeostasis.” *Circulation.* Lippincott Williams and Wilkins; 2019. pp. E186–  
440           E187. doi:10.1161/CIRCULATIONAHA.118.039305

- 441 18. Lemckert FA, Bournazos A, Eckert DM, Kenzler M, Hawkes JM, Butler TL, et al. Lack  
442 of MG53 in human heart precludes utility as a biomarker of myocardial injury or  
443 endogenous cardioprotective factor. *Cardiovasc Res.* 2016;110: 178–187.  
444 doi:10.1093/cvr/cvw017
- 445 19. Bian Z, Wang Q, Zhou X, Tan T, Park KH, Kramer HF, et al. Sustained elevation of  
446 MG53 in the bloodstream increases tissue regenerative capacity without  
447 compromising metabolic function. *Nat Commun.* 2019;10: 1–16. doi:10.1038/s41467-  
448 019-12483-0
- 449 20. Rui L, Yuan M, Frantz D, Shoelson S, White MF. SOCS-1 and SOCS-3 block insulin  
450 signaling by ubiquitin-mediated degradation of IRS1 and IRS2. *J Biol Chem.* 2002;277:  
451 42394–42398. doi:10.1074/jbc.C200444200
- 452 21. Xu X, Sarikas A, Dias-Santagata DC, Dolios G, Lafontant PJ, Tsai SC, et al. The  
453 CUL7 E3 Ubiquitin Ligase Targets Insulin Receptor Substrate 1 for Ubiquitin-  
454 Dependent Degradation. *Mol Cell.* 2008;30: 403–414.  
455 doi:10.1016/j.molcel.2008.03.009
- 456 22. Nagarajan A, Petersen MC, Nasiri AR, Butrico G, Fung A, Ruan H Bin, et al. MARCH1  
457 regulates insulin sensitivity by controlling cell surface insulin receptor levels. *Nat*  
458 *Commun.* 2016;7: 1–16. doi:10.1038/ncomms12639
- 459 23. Corcoran K, Jabbour M, Bhagwandin C, Deymier MJ, Theisen DL, Lybarger L.  
460 Ubiquitin-mediated regulation of CD86 protein expression by the ubiquitin ligase  
461 membrane-associated RING-CH-1 (MARCH1). *J Biol Chem.* 2011;286: 37168–37180.  
462 doi:10.1074/jbc.M110.204040
- 463 24. Majdoubi A, Lee JS, Kishta OA, Balood M, Moulefera MA, Ishido S, et al. Lack of the  
464 E3 Ubiquitin Ligase March1 Affects CD8 T Cell Fate and Exacerbates Insulin  
465 Resistance in Obese Mice. *Front Immunol.* 2020;11: 1953.  
466 doi:10.3389/fimmu.2020.01953
- 467  
468

**A**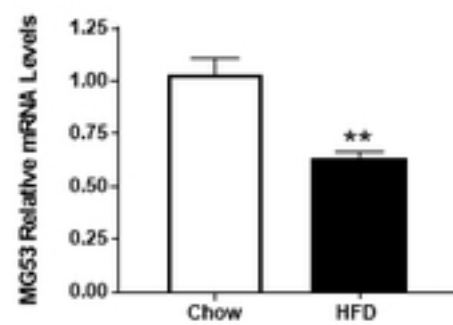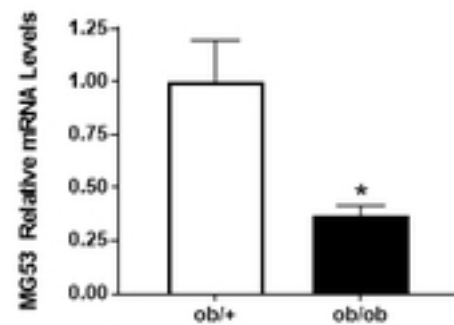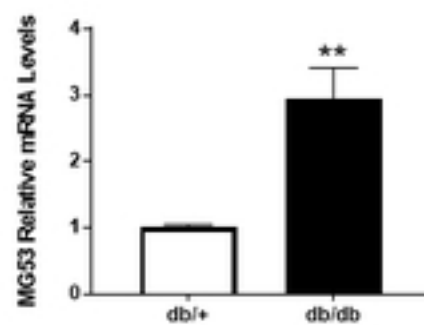**B**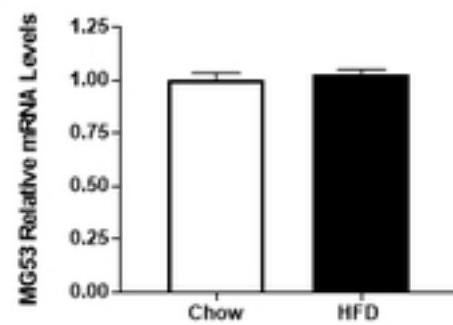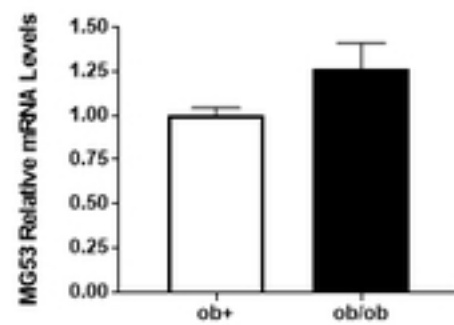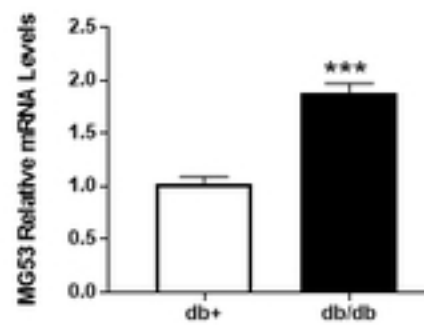

Fig 1

Figure 1

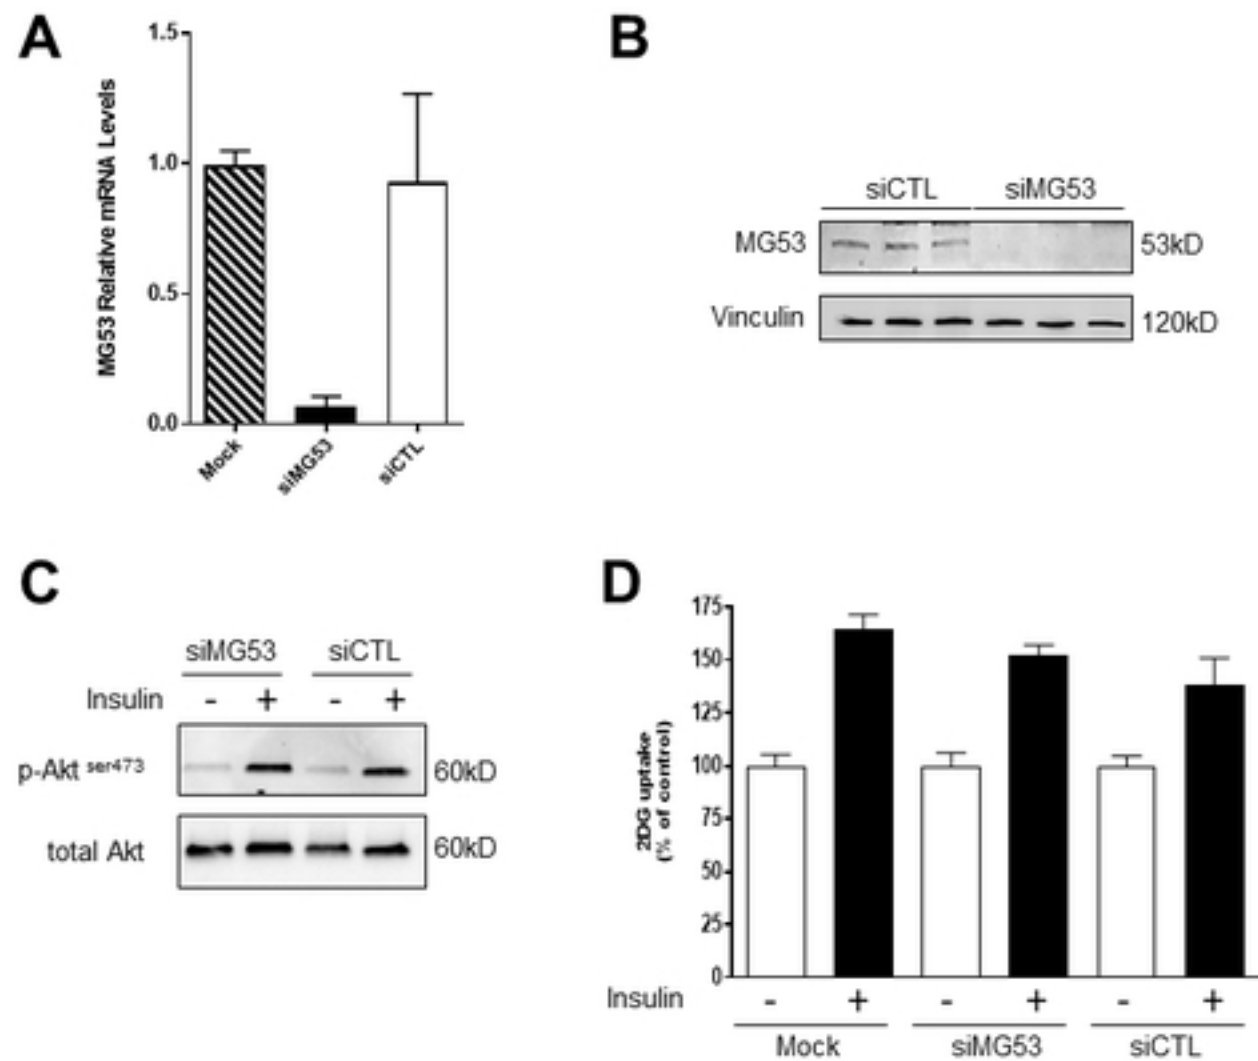

Fig 2

Figure 2

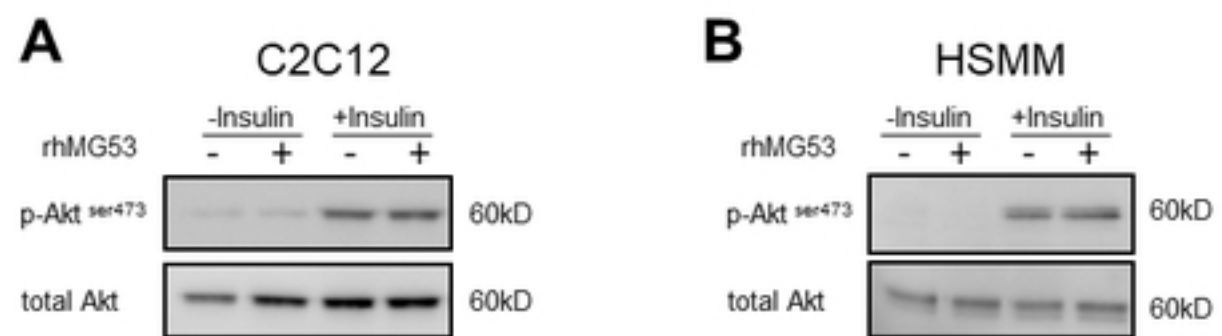

Fig 3

Figure 3

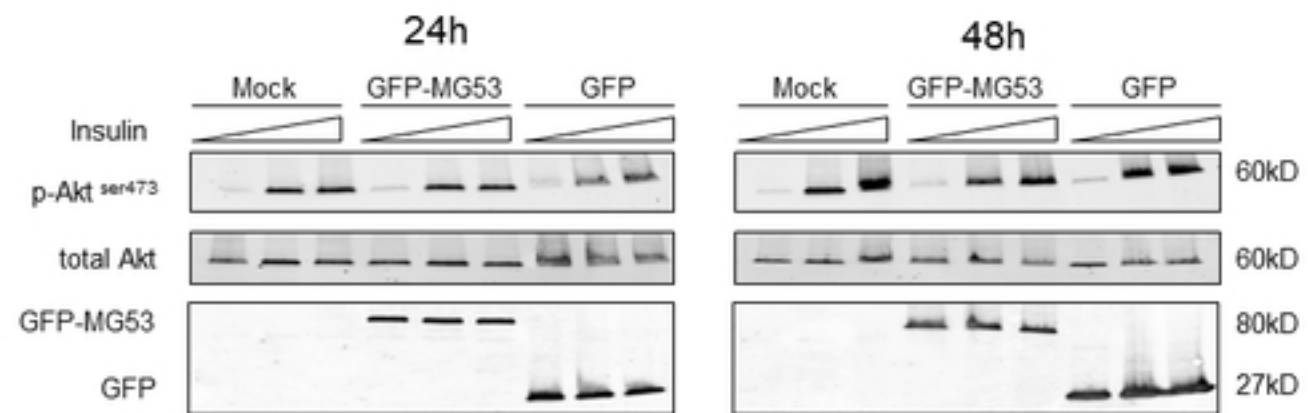

Fig 4

Figure 4



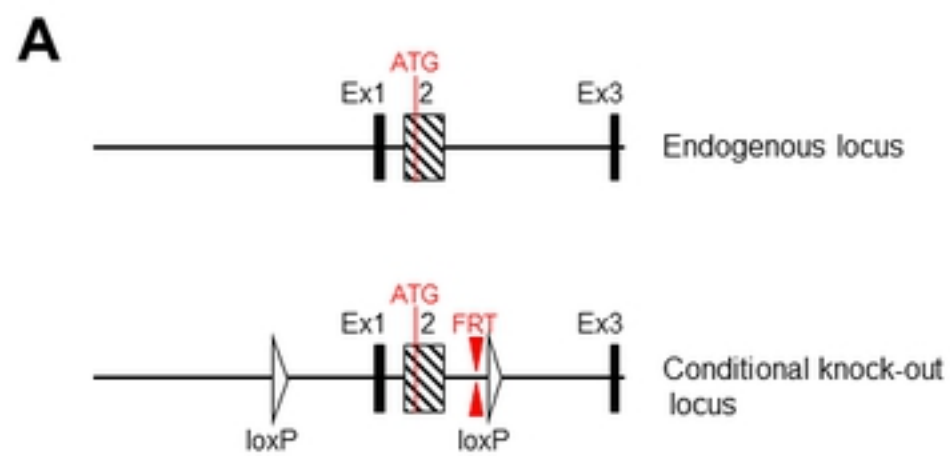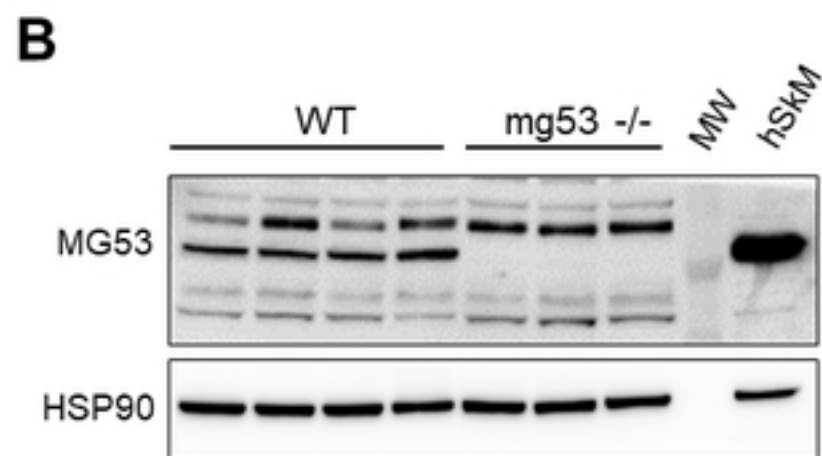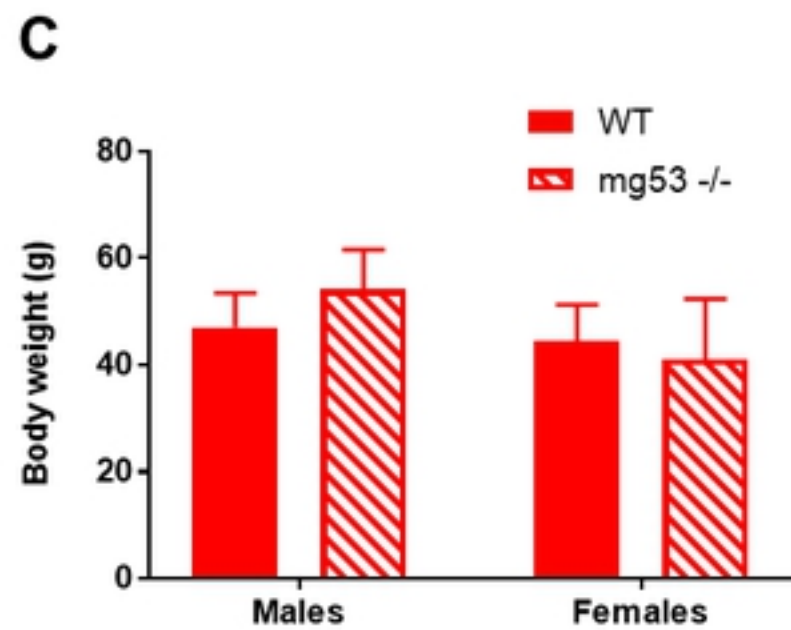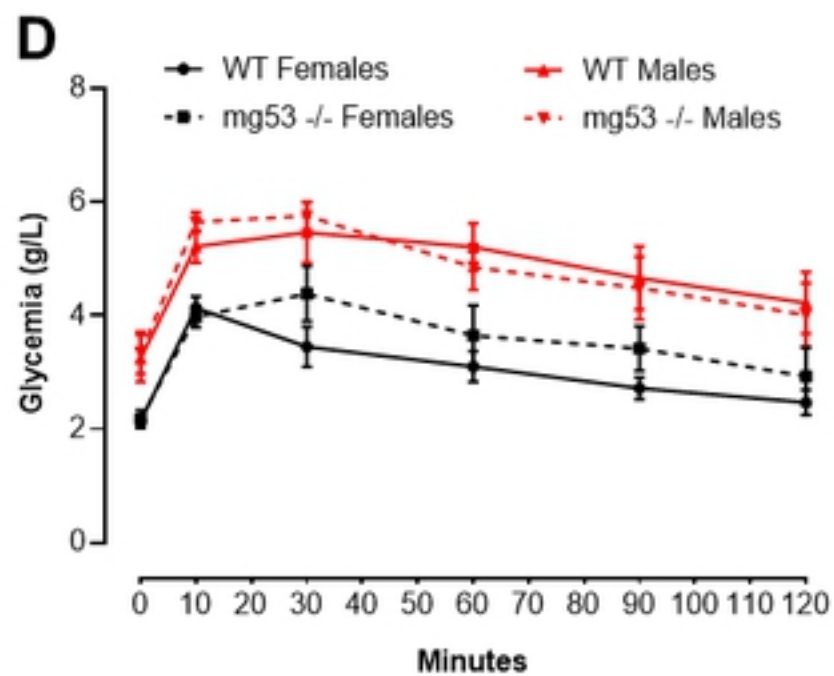

Fig 5

Figure 5
